# Supplementary material for: Ostracism via virtual chat room—Effects on basic needs, anger and pain
Source: PubMed Central journal article supplement (PMC5587273; doi:10.1371/journal.pone.0184215), 2017-09-06
Supplement: pone.0184215.s001.pdf [file pone.0184215.s001.pdf]

| ID | Age | Group    | Handedness | BDI | BAI | Rosenberg |    |
|----|-----|----------|------------|-----|-----|-----------|----|
| 2  | 20  | Exclusão | right      |     | 4   | 5         | 31 |
| 4  | 22  | Exclusão | right      |     | 3   | 1         | 31 |
| 6  | 19  | Exclusão | right      |     | 8   | 4         | 26 |
| 9  | 22  | Exclusão | right      |     | 5   | 3         | 27 |
| 12 | 18  | Exclusão | right      |     | 6   | 11        | 32 |
| 14 | 22  | Exclusão | right      |     | 5   | 3         | 28 |
| 19 | 21  | Exclusão | right      |     | 4   | 7         | 29 |
| 20 | 30  | Exclusão | right      |     | 9   | 9         | 34 |
| 25 | 18  | Exclusão | right      |     | 3   | 3         | 31 |
| 26 | 21  | Exclusão | left       |     | 7   | 12        | 30 |
| 27 | 18  | Exclusão | right      |     | 13  | 10        | 35 |
| 28 | 20  | Exclusão | right      |     | 7   | 3         | 27 |
| 29 | 20  | Exclusão | right      |     | 4   | 1         | 34 |
| 30 | 19  | Exclusão | right      |     | 7   | 26        | 33 |
| 33 | 19  | Exclusão | left       |     | 5   | 15        | 35 |
| 36 | 21  | Exclusão | right      |     | 7   | 9         | 31 |
| 38 | 31  | Exclusão | right      |     | 12  | 8         | 31 |
| 40 | 23  | Exclusão | right      |     | 16  | 19        | 28 |
| 43 | 20  | Exclusão | right      |     | 2   | 3         | 31 |
| 44 | 20  | Exclusão | left       |     | 5   | 10        | 26 |
| 45 | 18  | Exclusão | right      |     | 9   | 14        | 28 |
| 47 | 32  | Exclusão | right      |     | 4   | 5         | 34 |
| 48 | 23  | Exclusão | right      |     | 3   | 3         | 39 |
| 49 | 23  | Exclusão | right      |     | 16  | 8         | 28 |
| 51 | 19  | Exclusão | right      |     | 1   | 2         | 39 |
| 52 | 21  | Exclusão | right      |     | 7   | 3         | 32 |
| 53 | 23  | Exclusão | right      |     | 4   | 1         | 36 |
| 54 | 23  | Exclusão | right      |     | 7   | 2         | 37 |
| 1  | 21  | Inclusão | right      |     | 9   | 6         | 26 |
| 3  | 26  | Inclusão | right      |     | 9   | 2         | 33 |
| 5  | 25  | Inclusão | right      |     | 7   | 3         | 31 |
| 7  | 24  | Inclusão | right      |     | 10  | 14        | 28 |
| 8  | 25  | Inclusão | right      |     | 8   | 9         | 37 |
| 10 | 24  | Inclusão | right      |     | 9   | 10        | 30 |
| 11 | 24  | Inclusão | right      |     | 1   | 1         | 38 |
| 13 | 20  | Inclusão | right      |     | 7   | 11        | 31 |
| 15 | 20  | Inclusão | right      |     | 4   | 5         | 32 |
| 16 | 33  | Inclusão | right      |     | 4   | 3         | 38 |
| 17 | 23  | Inclusão | right      |     | 9   | 8         | 26 |
| 18 | 22  | Inclusão | right      |     | 5   | 8         | 30 |
| 21 | 20  | Inclusão | right      |     | 4   | 6         | 33 |
| 22 | 30  | Inclusão | right      |     | 4   | 3         | 37 |
| 23 | 21  | Inclusão | right      |     | 0   | 1         | 35 |
| 24 | 19  | Inclusão | right      |     | 12  | 10        | 20 |
| 31 | 20  | Inclusão | left       |     | 14  | 15        | 27 |

|    |             |       |    |    |    |
|----|-------------|-------|----|----|----|
| 32 | 20 Inclusão | right | 7  | 2  | 26 |
| 34 | 20 Inclusão | right | 4  | 10 | 37 |
| 35 | 25 Inclusão | left  | 13 | 9  | 26 |
| 37 | 34 Inclusão | right | 10 | 14 | 38 |
| 39 | 19 Inclusão | right | 8  | 14 | 33 |
| 41 | 21 Inclusão | right | 8  | 16 | 31 |
| 42 | 19 Inclusão | right | 11 | 13 | 31 |
| 46 | 26 Inclusão | left  | 8  | 20 | 31 |
| 50 | 22 Inclusão | left  | 6  | 9  | 35 |

| Social Desiral SAI | RES | Anger | Happiness | Resentment | Sadness |
|--------------------|-----|-------|-----------|------------|---------|
| 11                 | 112 | 4     | 1         | 2          | 1       |
| 9                  | 92  | 3     | 1         | 2          | 1       |
| 6                  | 104 | 3     | 4         | 3          | 2       |
| 5                  | 85  | 4     | 1         | 4          | 1       |
| 9                  | 113 | 4     | 3         | 2          | 6       |
| 8                  | 89  | 4     | 1         | 4          | 1       |
| 9                  | 82  | 3     | 1         | 4          | 2       |
| 10                 | 85  | 4     | 1         | 4          | 1       |
| 8                  | 83  | 3     | 3         | 4          | 3       |
| 6                  | 81  | 4     | 2         | 2          | 2       |
| 15                 | 106 | 4     | 1         | 3          | 3       |
| 10                 | 91  | 3     | 1         | 2          | 1       |
| 11                 | 105 | 3     | 1         | 5          | 1       |
| 5                  | 82  | 3     | 1         | 4          | 3       |
| 6                  | 123 | 4     | 2         | 6          | 1       |
| 9                  | 95  | 3     | 2         | 2          | 2       |
| 9                  | 81  | 3     | 1         | 4          | 5       |
| 8                  | 83  | 4     | 3         | 4          | 3       |
| 11                 | 108 | 3     | 1         | 4          | 1       |
| 15                 | 106 | 4     | 1         | 5          | 1       |
| 10                 | 81  | 4     | 1         | 5          | 1       |
| 11                 | 105 | 4     | 2         | 4          | 1       |
| 9                  | 98  | 4     | 2         | 2          | 3       |
| 13                 | 78  | 4     | 1         | 1          | 1       |
| 12                 | 112 | 4     | 1         | 5          | 1       |
| 4                  | 80  | 3     | 3         | 3          | 2       |
| 11                 | 132 | 4     | 1         | 4          | 1       |
| 10                 | 104 | 4     | 2         | 6          | 1       |
| 9                  | 91  | 3     | 1         | 1          | 6       |
| 8                  | 121 | 4     | 1         | 4          | 1       |
| 9                  | 96  | 3     | 1         | 4          | 1       |
| 9                  | 82  | 4     | 1         | 2          | 1       |
| 12                 | 109 | 4     | 1         | 5          | 1       |
| 8                  | 110 | 3     | 1         | 3          | 1       |
| 8                  | 93  | 4     | 1         | 1          | 1       |
| 7                  | 78  | 3     | 1         | 3          | 1       |
| 9                  | 110 | 3     | 1         | 5          | 1       |
| 1                  | 103 | 3     | 1         | 5          | 1       |
| 6                  | 58  | 4     | 1         | 4          | 2       |
| 8                  | 102 | 4     | 1         | 4          | 1       |
| 13                 | 92  | 4     | 1         | 5          | 1       |
| 11                 | 99  | 4     | 1         | 4          | 1       |
| 17                 | 96  | 4     | 1         | 4          | 1       |
| 12                 | 71  | 3     | 1         | 4          | 1       |
| 6                  | 104 | 3     | 1         | 2          | 2       |

|    |     |   |   |   |   |   |
|----|-----|---|---|---|---|---|
| 10 | 103 | 4 | 1 | 1 | 1 | 1 |
| 13 | 111 | 4 | 1 | 1 | 1 | 1 |
| 10 | 68  | 3 | 2 | 4 | 3 | 2 |
| 9  | 101 | 4 | 1 | 3 | 1 | 1 |
| 11 | 103 | 3 | 2 | 5 | 1 | 1 |
| 5  | 108 | 4 | 1 | 4 | 1 | 1 |
| 3  | 105 | 3 | 1 | 4 | 2 | 4 |
| 14 | 101 | 4 | 1 | 3 | 1 | 1 |
| 13 | 101 | 4 | 1 | 3 | 1 | 1 |

| Belonging | Control | Self-esteem | Meaningful e | Received me | Painful exper | Believe |
|-----------|---------|-------------|--------------|-------------|---------------|---------|
| 11        | 11      | 15          | 17           | 15          | 6             | 70      |
| 10        | 7       | 18          | 18           | 25          | 2             | 50      |
| 11        | 13      | 24          | 25           | 15          | 2             | 80      |
| 19        | 18      | 19          | 21           | 10          | 2             | 100     |
| 10        | 7       | 20          | 12           | 10          | 6             | 100     |
| 17        | 17      | 25          | 24           | 20          | 5             | 100     |
| 18        | 14      | 30          | 20           | 20          | 3             | 100     |
| 22        | 16      | 30          | 26           | 20          | 1             | 80      |
| 13        | 14      | 22          | 11           | 10          | 3             | 100     |
| 14        | 14      | 23          | 22           | 20          | 3             | 100     |
| 15        | 17      | 30          | 21           | 25          | 2             | 100     |
| 15        | 17      | 30          | 21           | 20          | 3             | 100     |
| 16        | 25      | 32          | 23           | 15          | 1             | 50      |
| 8         | 10      | 18          | 13           | 15          | 4             | 100     |
| 23        | 19      | 30          | 22           | 33          | 1             | 100     |
| 17        | 18      | 29          | 19           | 10          | 2             | 65      |
| 18        | 16      | 18          | 20           | 9           | 4             | 45      |
| 16        | 18      | 20          | 22           | 20          | 2             | 80      |
| 22        | 13      | 28          | 25           | 20          | 1             | 90      |
| 25        | 13      | 35          | 30           | 20          | 1             | 100     |
| 22        | 16      | 25          | 19           | 10          | 1             | 50      |
| 17        | 19      | 27          | 32           | 13          | 1             | 40      |
| 5         | 18      | 23          | 16           | 20          | 3             | 100     |
| 20        | 14      | 16          | 13           | 10          | 1             | 50      |
| 14        | 14      | 29          | 19           | 10          | 1             | 70      |
| 17        | 15      | 21          | 18           | 20          | 1             | 70      |
| 15        | 12      | 31          | 7            | 10          | 1             | 100     |
| 20        | 14      | 26          | 23           | 20          | 1             | 90      |
| 17        | 23      | 25          | 22           | 85          | 1             | 100     |
| 22        | 11      | 29          | 32           | 30          | 1             | 100     |
| 32        | 15      | 35          | 30           | 45          | 1             | 100     |
| 20        | 16      | 21          | 21           | 20          | 6             | 95      |
| 24        | 27      | 34          | 33           | 33          | 1             | 85      |
| 27        | 24      | 26          | 30           | 33          | 1             | 50      |
| 27        | 11      | 29          | 35           | 33          | 3             | 50      |
| 18        | 13      | 28          | 28           | 50          | 1             | 100     |
| 28        | 18      | 31          | 33           | 33          | 1             | 80      |
| 16        | 15      | 23          | 25           | 32          | 1             | 70      |
| 25        | 19      | 22          | 29           | 33          | 1             | 100     |
| 22        | 11      | 34          | 25           | 33          | 1             | 100     |
| 32        | 28      | 31          | 32           | 33          | 1             | 100     |
| 23        | 17      | 31          | 28           | 33          | 1             | 90      |
| 22        | 24      | 25          | 23           | 33          | 1             | 100     |
| 24        | 22      | 28          | 29           | 33          | 1             | 100     |
| 24        | 21      | 26          | 28           | 40          | 1             | 100     |

|    |    |    |    |    |   |     |
|----|----|----|----|----|---|-----|
| 23 | 17 | 35 | 35 | 33 | 1 | 100 |
| 31 | 18 | 35 | 33 | 20 | 1 | 100 |
| 30 | 16 | 35 | 33 | 30 | 1 | 100 |
| 28 | 26 | 34 | 33 | 33 | 1 | 80  |
| 26 | 18 | 35 | 30 | 33 | 1 | 80  |
| 33 | 16 | 31 | 33 | 33 | 1 | 80  |
| 28 | 16 | 33 | 31 | 33 | 1 | 100 |
| 28 | 26 | 34 | 33 | 33 | 1 | 100 |
| 29 | 20 | 35 | 35 | 30 | 1 | 40  |



1  
1  
1  
1  
1  
1  
1  
1  
1  
1  
1
